# Supplementary material
Source: PubMed Central journal article supplement (PMC5270562)
Supplement: ismej2016121x2.pdf [file ismej2016121x2.pdf]

## Supplementary Figures

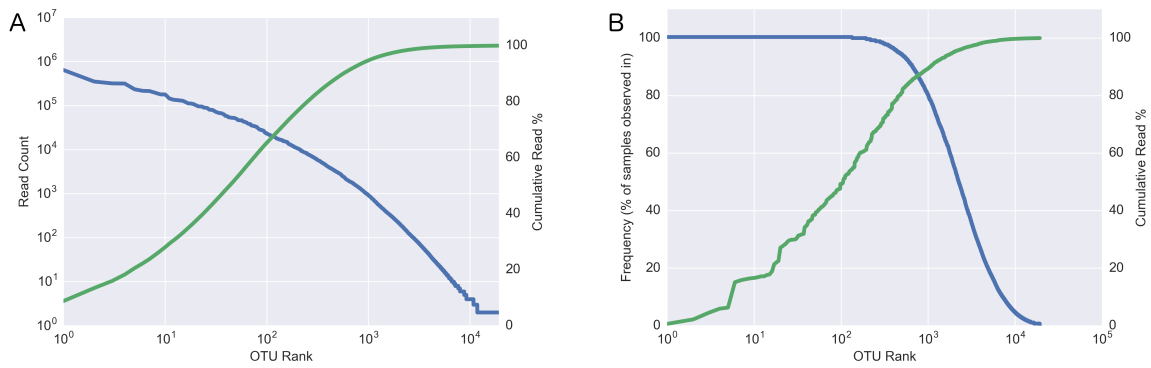

**Supplementary Figure 1.** Rank abundance curves sorted by OTU raw abundance (A) and OTU frequency (B). 134 OTUs were core to every time point, and accounted for over 51% of total reads. Similarly, the top 100 OTUs by absolute read abundance accounted for over 60% of all reads.

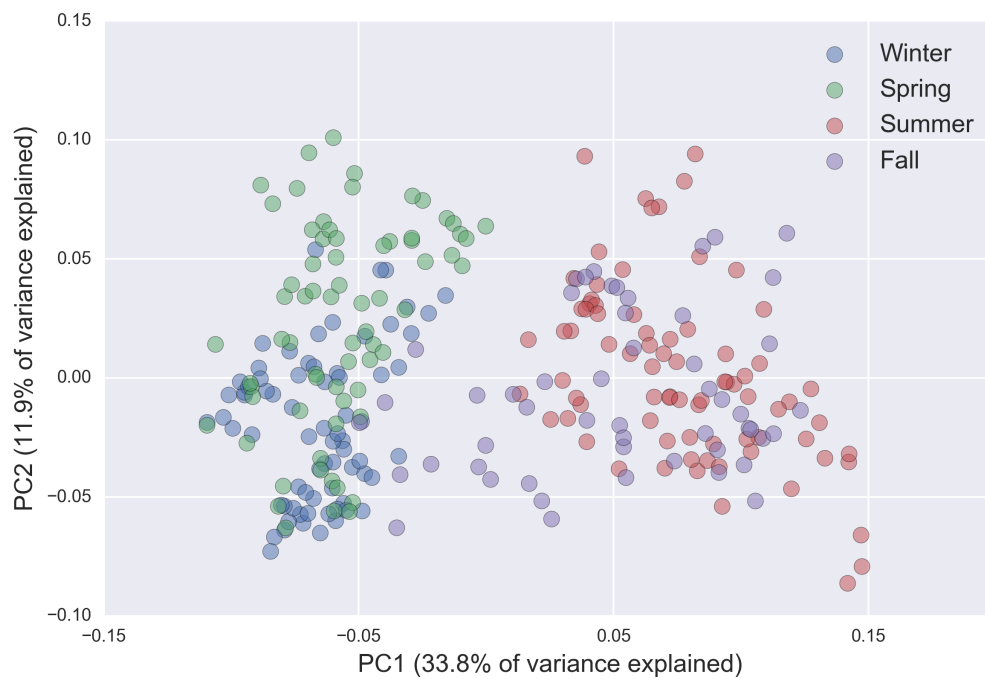

**Supplementary Figure 2.** Principal Coordinate Analysis of all samples, colored by season of origin. Samples roughly grouped by season with winter and spring together and summer and fall grouped.

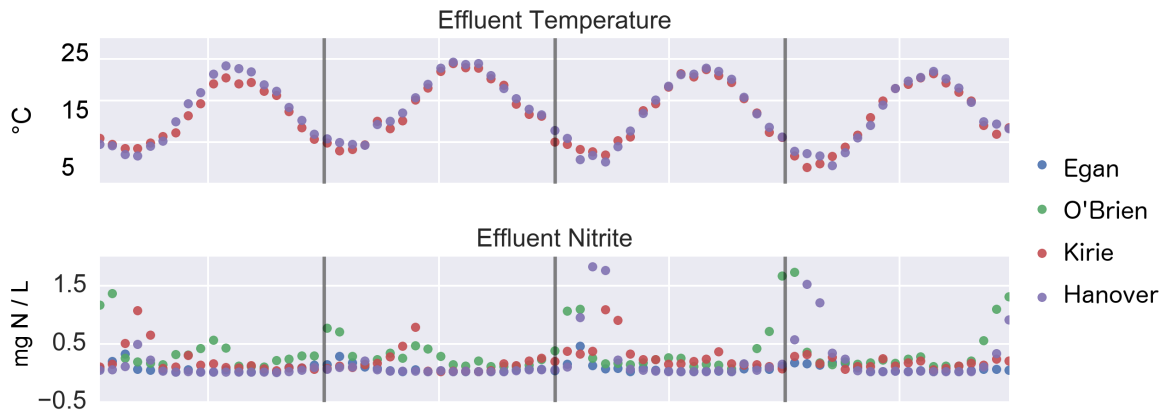

**Supplementary Figure 3.** Seasonal temperature (top) and effluent nitrite concentration (bottom) over a four-year period showing seasonal effluent nitrite residual in multiple plants.

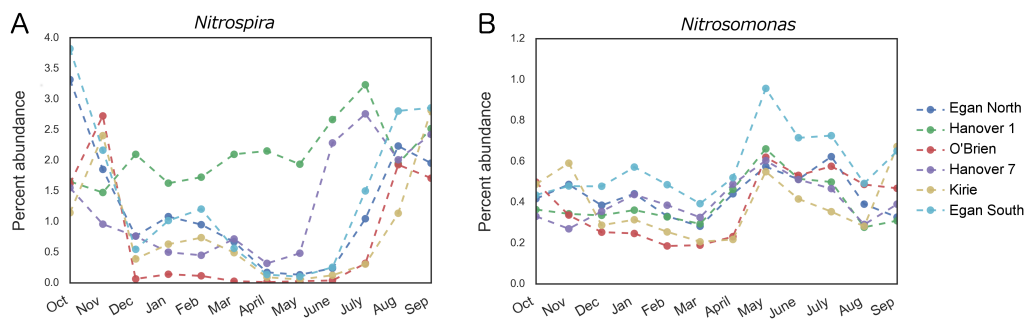

**Supplementary Figure 4.** Seasonal variability in *Nitrospira* and *Nitrosomonas* abundance at genus level. All but one reactor (Hanover 1) exhibited strong seasonal variability in *Nitrospira* abundance and relatively stable *Nitrosomonas* abundance.

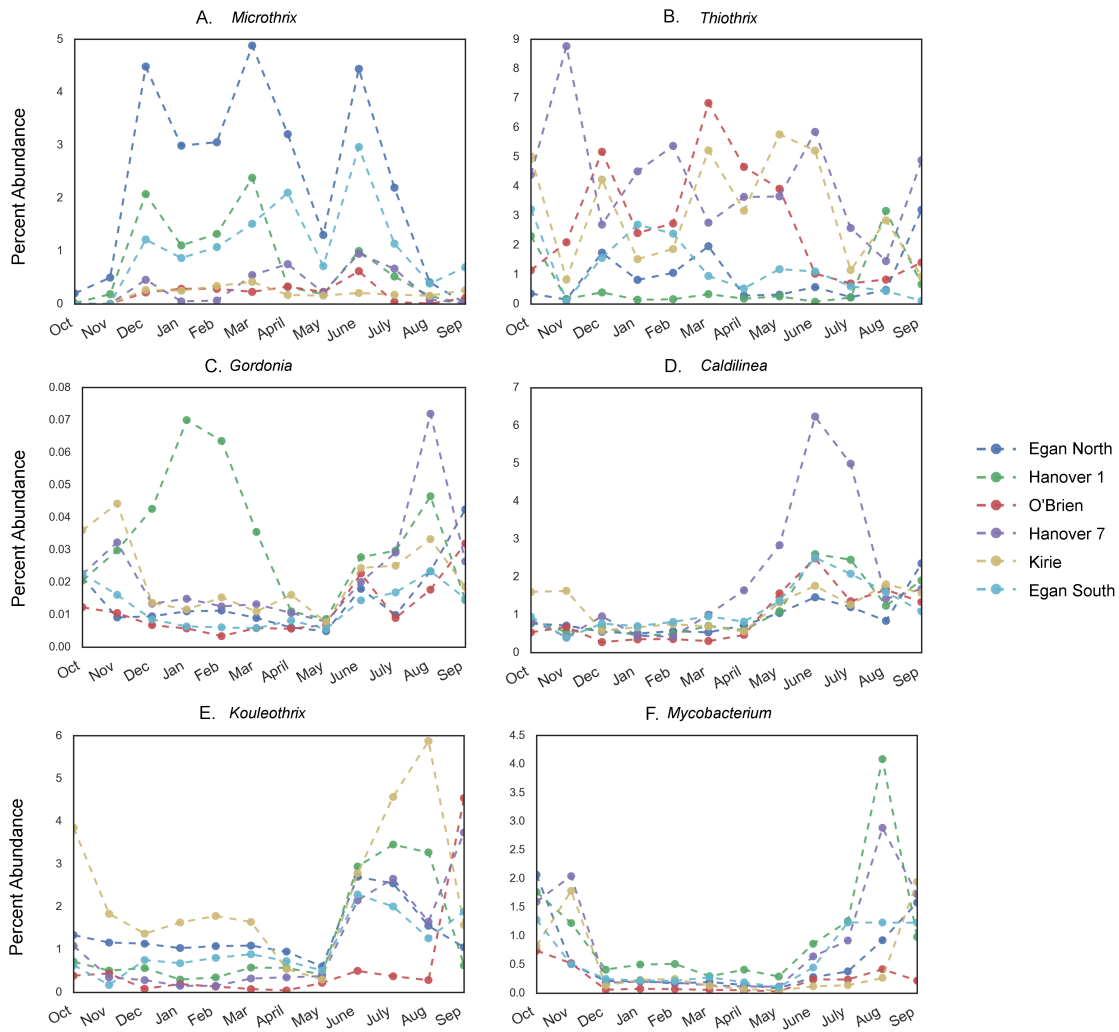

**Supplementary Figure 5.** Seasonal variation in the top 6 most abundant bulking and filamentous genera. *Microthrix* (A) and *Thiothrix* (B) were the two most abundant genera and *Microthrix* was present during several bulking episodes. Other genera displayed synchronized variation.
